# Supplementary material for: Overlimiting current by iodide electrode oxidation in aqueous media: an electrogenerated iodine interphase with positively charged channels stimulating in situ electrokinetic iodide transport
Source: Royal Society of Chemistry journal article supplement (doi:10.1039/d3ta01505j), 2023-01-01
Supplement: d3ta01505j1.pdf [file d3ta01505j1.pdf]

## Supporting Information

### **Overlimiting current by iodide electrode oxidation in aqueous media: an electrogenerated iodine interphase with positively charged channels stimulating *in situ* electrokinetic iodide transport**

Sehyeok Ki<sup>#a</sup>, Anseong Park<sup>#b</sup>, Won Bo Lee<sup>b</sup>, YongJoo Kim<sup>\*c</sup>, Jinho Chang<sup>\*ad</sup>

<sup>a</sup>Department of Chemistry and Research Institute for Convergence of Basic Science, Hanyang University, Seoul, 04763, Republic of Korea

<sup>b</sup>School of Chemical and Biological Engineering, Seoul National University, Seoul, 08826, Republic of Korea

<sup>c</sup>Department of Materials Science and Engineering, Kookmin University, Seoul, 02707, Republic of Korea

<sup>d</sup>Department of HY-KIST Bio-convergence, Hanyang University, Seoul, 04763, Republic of Korea

# S.K. and A.P. contributed equally to this work

## Table of Contents

|                                                                                                                                                                                                                                                                                                                                                                                                                                                                                                                                                                                                                     |      |
|---------------------------------------------------------------------------------------------------------------------------------------------------------------------------------------------------------------------------------------------------------------------------------------------------------------------------------------------------------------------------------------------------------------------------------------------------------------------------------------------------------------------------------------------------------------------------------------------------------------------|------|
| <b>Figure S1</b> .....                                                                                                                                                                                                                                                                                                                                                                                                                                                                                                                                                                                              | S-6  |
| CV obtained using a Pt UME at 0.02 V/s in an aqueous 1 M HClO <sub>4</sub> solution containing 1 mM NaI.                                                                                                                                                                                                                                                                                                                                                                                                                                                                                                            |      |
| <b>Note S1</b> .....                                                                                                                                                                                                                                                                                                                                                                                                                                                                                                                                                                                                | S-7  |
| The voltammetric electrode reaction process associated with the electro-oxidation of I <sup>-</sup> in an aqueous solution with low concentration of I <sup>-</sup> .                                                                                                                                                                                                                                                                                                                                                                                                                                               |      |
| <b>Figure S2</b> .....                                                                                                                                                                                                                                                                                                                                                                                                                                                                                                                                                                                              | S-8  |
| (a) CVs at 0.02 V/s obtained using a Pt UME in aqueous solutions containing 1 M HClO <sub>4</sub> with different $C_{I^-}^*$ . (b) The corresponding $E_{onset}$ vs. $\log C_{I^-}^*$ plot estimated from the CVs in the solutions with the corresponding $C_{I^-}^*$ .                                                                                                                                                                                                                                                                                                                                             |      |
| <b>Note S2</b> .....                                                                                                                                                                                                                                                                                                                                                                                                                                                                                                                                                                                                | S-9  |
| The detailed description of the finite element analysis for I <sub>3</sub> <sup>-</sup> /I <sub>2</sub> half-redox reaction using a Pt UME under the diffusion-governed condition.                                                                                                                                                                                                                                                                                                                                                                                                                                  |      |
| <b>Figure S3</b> .....                                                                                                                                                                                                                                                                                                                                                                                                                                                                                                                                                                                              | S-10 |
| The description of the domain and boundaries for the finite element analysis, as described in Note S2.                                                                                                                                                                                                                                                                                                                                                                                                                                                                                                              |      |
| <b>Figure S4</b> .....                                                                                                                                                                                                                                                                                                                                                                                                                                                                                                                                                                                              | S-11 |
| The multi-cycles CVs obtained using a Pt UME at 0.02 V/s in an aqueous solution containing 10 mM NaI with 1 M HClO <sub>4</sub> , showing 1 <sup>st</sup> (black), 5 <sup>th</sup> (blue), and 10 <sup>th</sup> (red) cycle, respectively.                                                                                                                                                                                                                                                                                                                                                                          |      |
| <b>Figure S5</b> .....                                                                                                                                                                                                                                                                                                                                                                                                                                                                                                                                                                                              | S-12 |
| CV obtained using a Pt UME at 0.02 V/s in an aqueous solution containing 1 mM NaI + 4 M HClO <sub>4</sub> .                                                                                                                                                                                                                                                                                                                                                                                                                                                                                                         |      |
| <b>Figure S6</b> .....                                                                                                                                                                                                                                                                                                                                                                                                                                                                                                                                                                                              | S-13 |
| The contour plot of $C_{I_2}$ obtained from the finite element analysis when the oxidative current increases to 29.5 nA due to the electro-oxidation of I <sub>3</sub> <sup>-</sup> .                                                                                                                                                                                                                                                                                                                                                                                                                               |      |
| <b>Figure S7</b> .....                                                                                                                                                                                                                                                                                                                                                                                                                                                                                                                                                                                              | S-14 |
| (a) The phase diagrams of I <sub>2</sub> interfacial structures with/without I <sup>-</sup> -channels as blue and red circles, respectively, at various weight percentages of H <sub>2</sub> O, I <sub>2</sub> , and (H <sub>3</sub> O) <sup>+</sup> ClO <sub>4</sub> <sup>-</sup> estimated from (b) the corresponding MD simulation results; the phases of the iodine structures at the designated numbers were estimated from the MD results with the matched numbers. (c) The representative unit cell and its enlarged region are surrounded by dotted rectangle to show each molecule used in the simulation. |      |

**Figure S8**.....S-15

The visualized electrolyte channels from the expanded iodine structures, which are shown as representatives of the porous iodine structure with electrolyte channels in Figure 3b.

**Note S3**.....S-16

The detailed description of the finite element analysis for electrokinetic transport of I<sup>-</sup> through the model channel.

**Figure S9**.....S-18

The simplified model channel with the 2D domain for the finite element analysis.

**Note S4**.....S-19

The simulated electrokinetic transport of I<sup>-</sup> through the model channel with a neutral surface charge at  $\Delta\phi = +3$  V.

**Figure S10**.....S-21

(a)  $J_{I^-}$  associated with diffusion (black) and migration (red). (b)  $C_{I^-}$  vs.  $d(z)$  at  $\Delta\phi = 0$  V. (c)  $\phi$ . (d)  $J_{\text{Electric}}$  (e)  $J_{I^-}$  associated with diffusion (black) and migration (red). (f)  $C_{I^-}$  vs.  $d(z)$  at  $\Delta\phi = 3$  V;  $z$ -axis from the electrode to the top of the channel, as described in Figure S9.

**Figure S11**.....S-22

The contour plots of  $\phi$  through the model channel at  $\sigma_{Ch} =$  (a) -5, (b) -1, (c) 0, (d) 1, and (e) 5 mC/m<sup>2</sup>.

**Figure S12**.....S-23

The contour plots of  $J_{\text{Electric}}$  through the model channel at  $\sigma_{Ch} =$  (a) -5, (b) -1, (c) 0, (d) 1, and (e) 5 mC/m<sup>2</sup>.

**Figure S13**.....S-24

The contour plots of  $J_{I^-}$  through the entire model channel at  $\sigma_{Ch} =$  (a) -5, (b) -1, (c) +1, and (d) +5 mC/m<sup>2</sup>; the points and lengths of the arrows designate the directions and the magnitudes of  $J_{I^-}$ .

**Figure S14**.....S-25

The contour plots of  $J_{\text{Electric}}$  through the model channel with  $l_{Ch} =$  (a) 400, (b) 200, and (c) 100 nm at  $\sigma_{Ch} = +5$  mC/m<sup>2</sup> and  $w_{Ch} = 100$  nm.

**Note S5**.....S-26

The detailed description of  $i_{EK}$  affected by  $w_{Ch}$ .

**Figure S15**.....S-27

The simulated normalized current ( $i_{EK}/i_D$ ) vs.  $\Delta\phi$  plots at  $\sigma_{Ch} = +5$  mC/m<sup>2</sup> with  $w_{Ch} = 30$  (blue),

50 (red), and 100 nm (black).

**Figure S16.**.....S-28

The contour plots of  $J_{I^-}$  in the vicinity of the electrode from the model channel at  $\sigma_{Ch} = 5$  mC/m<sup>2</sup> when  $w_{Ch} =$  (a) 100, (b) 50, and (c) 30 nm at  $l_{Ch} = 400$  nm.

**Figure S17.**.....S-29

CVs obtained using an aqueous 1 M NaI solutions with  $C_{LiClO_4}^* = 3$  M (black) and 4 M (red).

**Figure S18.**.....S-30

(a) The phase diagrams of I<sub>2</sub> interfacial structures with/without I<sup>-</sup>-channels as blue and red circles, respectively, at various weight percentages of H<sub>2</sub>O, I<sub>2</sub>, and LiClO<sub>4</sub> estimated from (b) the corresponding MD simulation results; the phases of the iodine structures with the designated numbers were estimated from the MD results with the matched numbers.

**Figure S19.**.....S-31

(a) The phase diagrams of I<sub>2</sub> interfacial structures with/without I<sup>-</sup>-channels as blue and red circles, respectively, at various weight percentages of H<sub>2</sub>O, I<sub>2</sub>, and NaClO<sub>4</sub> estimated from (b) the corresponding MD simulation results; the phases of the iodine structures with the designated numbers were estimated from the MD results with the matched numbers.

**Figure S20.**.....S-32

CVs obtained using an aqueous 1 M NaI solutions with  $C_{H_2SO_4}^*$  from 2 to 7 M.

**Figure S21.**.....S-33

The (a)  $\Delta i_{EK}/\Delta E$  and (b)  $i_{EK,Max}$  vs.  $C_i^*$  plots from the CVs obtained using 1 M NaI solution containing the two different electrolytes ( $i = HClO_4$  and  $H_2SO_4$ ) at varied concentrations.

**Figure S22.**.....S-34

CVs obtained using an aqueous 1 M NaI solution with  $C_{HBr}^*$  from 1 to 7 M.

**Figure S23.**.....S-35

The two sets of  $i-t$  experiments measured using a Pt UME in an aqueous 1 M NaI solution containing 4 M HClO<sub>4</sub> with different electrode potentials; 0.614 (blue), 0.62 (red), and 0.629 (black) for 300 s.

**Figure S24.**.....S-36

The obtained multi-cycles chronoamperogram (CA) using a Pt UME in an aqueous solution containing 1 M NaI with 4 M HClO<sub>4</sub>.

**Table S1.** .....S-37

Room temperature ionic conductivity ( $\sigma$ ) of (top) 1 M HClO<sub>4</sub> aqueous solutions with different

bulk I<sup>-</sup> concentrations,  $C_{I^-}^*$ , and (bottom) 1 M NaI aqueous solutions with different bulk electrolyte conditions,  $C_i^*$ . Conductivity of blank spaces in the Table was not obtained due to limited solubility of salts in corresponding conditions in an aqueous solution.

**Table S2.** .....S-38

The number of simulated molecules (right) for each weight percentage condition (left).

**Table S3.** .....S-40

The domain and boundary conditions used for the finite element analysis, as described in Note S2 using the domain shown in Figure S3.

**Table S4.** .....S-41

The boundary conditions used in the finite element analyses, as described in Note S3 using the domain shown in Figure S9.

**References.**.....S-42

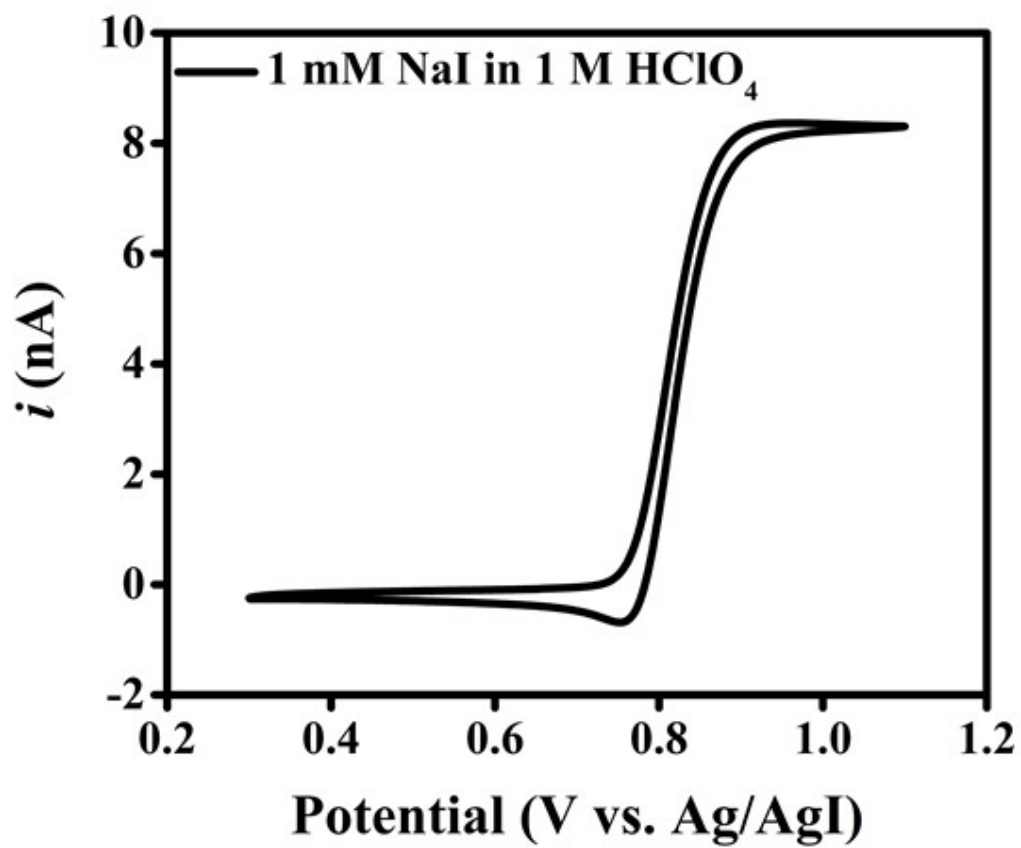

**Figure S1.** CV obtained using a Pt UME at 0.02 V/s in an aqueous 1 M HClO<sub>4</sub> solution containing 1 mM NaI.

**Note S1. The voltammetric electrode reaction process associated with the electro-oxidation of I<sup>-</sup> in an aqueous solution with low concentration of I<sup>-</sup>.**

The thorough study of the voltammetric electrode reaction process in aqueous solutions containing the low concentration of I<sup>-</sup> ( $\leq 20$  mM) through the rotating ring disk electrode (RRDE) analysis was previously reported from our group.<sup>1</sup>

In the stated previous article (see Figure 1a and the description in the corresponding article), we found that I<sup>-</sup> was initially electro-oxidized to soluble I<sub>3</sub><sup>-</sup> on the disk electrode, while the electrogenerated I<sub>3</sub><sup>-</sup> was collected until the disk potential was positively biased to 0.53 V (vs. Ag/AgCl), where the disk current reached at the quasi limiting value. Then, the disk current abruptly increased while the ring current was found to be decreased as the disk potential was further positively biased due to the electro-oxidation of I<sub>3</sub><sup>-</sup> to non-mass transferrable I<sub>2</sub>.

Based on the observed RRDE voltammogram, the quasi limiting current in Figure 1a of this article was associated with electro-oxidation of I<sup>-</sup> to I<sub>3</sub><sup>-</sup> at the diffusion governed condition, and therefore, could be theoretically estimated through the well-known equation (Eq. 2 of this manuscript) described in elsewhere.<sup>2</sup>

(a)

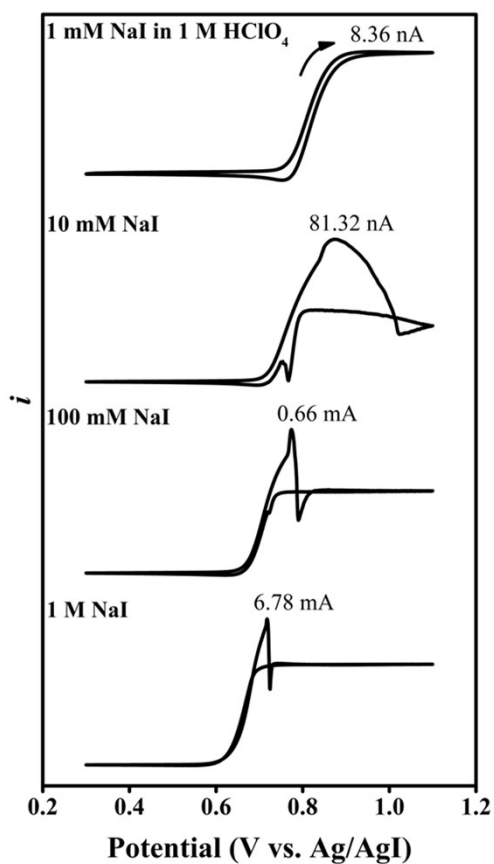

(b)

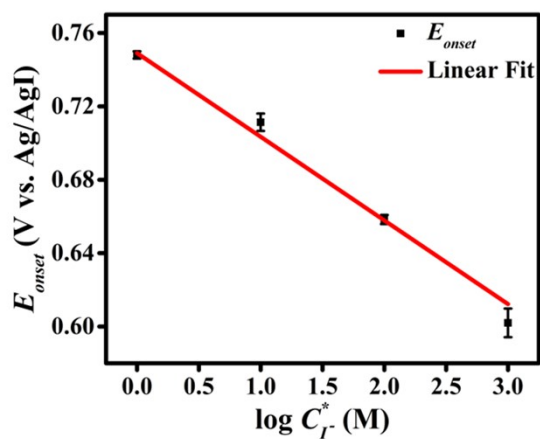

**Figure S2.** (a) CVs at 0.02 V/s obtained using a Pt UME in aqueous solutions containing 1 M

HClO<sub>4</sub> with different  $C_{I^-}^*$ . (b) The corresponding  $E_{onset}$  vs.  $\log C_{I^-}^*$  plot estimated from the

CVs in the solutions with the corresponding  $C_{I^-}^*$ .



**Note S2. The detailed description of the finite element analysis for I<sub>3</sub><sup>-</sup>/I<sub>2</sub> half-redox reaction using a Pt UME under the diffusion-governed condition.**

Figure S3 shows the 2D axial domain and boundaries for finite element analysis, which describes the electro-oxidation of I<sub>3</sub><sup>-</sup> on the Pt UME. Three different boundaries were delineated: black, red, and blue. First, B1 represents the bulk solution where the concentration of I<sub>3</sub><sup>-</sup> was constant. B2 represents an electrically insulating UME sheath. Finally, B3 corresponds to the electrode with a radius of 12.5 μm.

Two equations were coupled and solved to investigate electrode oxidation of I<sub>3</sub><sup>-</sup> to I<sub>2</sub> in the electroneutrality domain. The flux of *i* species,  $J_i$ , was obtained by solving the Nernst-Planck equation (S1) considering only diffusion in the entire domain.

$$J_i = -D_i \nabla C_i \quad (\text{S1})$$

here,  $D_i$  is the diffusion coefficient of *i* chemical species.  $D_{I_3^-}$  and  $D_{I_2}$  are assumed to be the same as  $D_{I^-}$ . In addition, the electrode kinetics were determined by the Butler-Volmer relation<sup>3</sup> and the electro-oxidation of I<sub>3</sub><sup>-</sup> was considered to be Nernstian. Table S3 lists the summarized domain and boundary conditions for the finite element analysis.

The abovementioned equations were solved within the domain using the electroanalysis module of the COMSOL Multiphysics software (ver. 6.0). Analyses were conducted under time-dependent conditions.

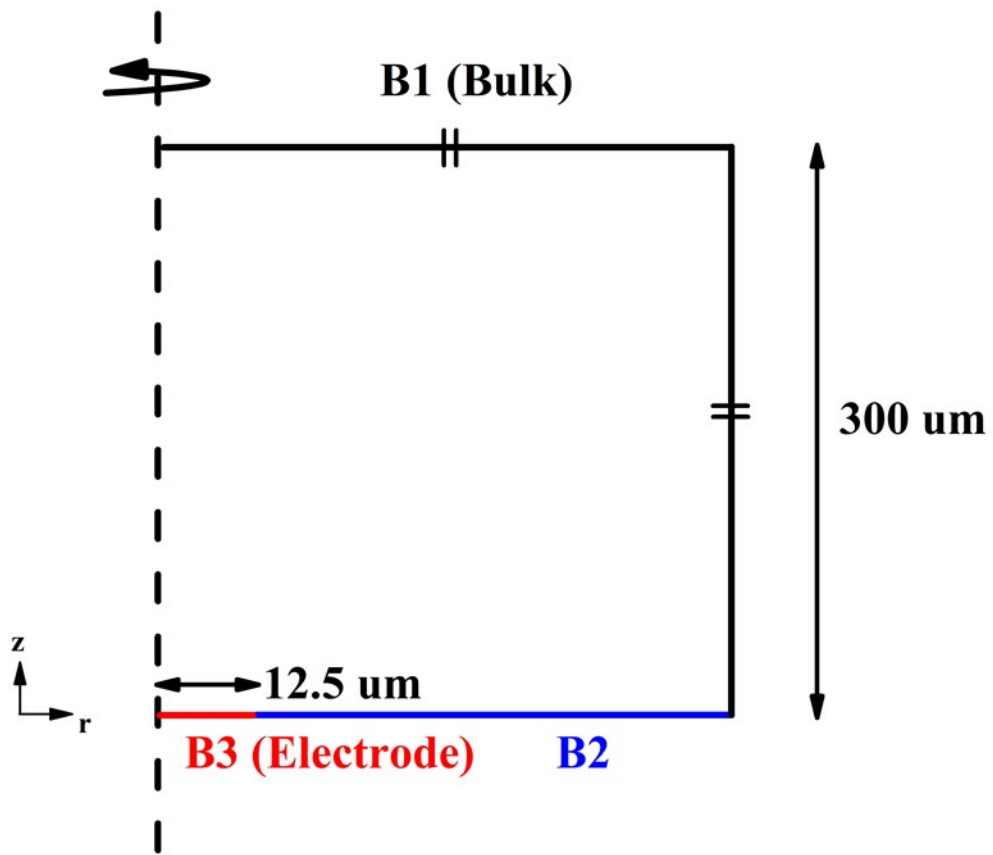

**Figure S3.** The description of the domain and boundaries for the finite element analysis, as described in Note S2.

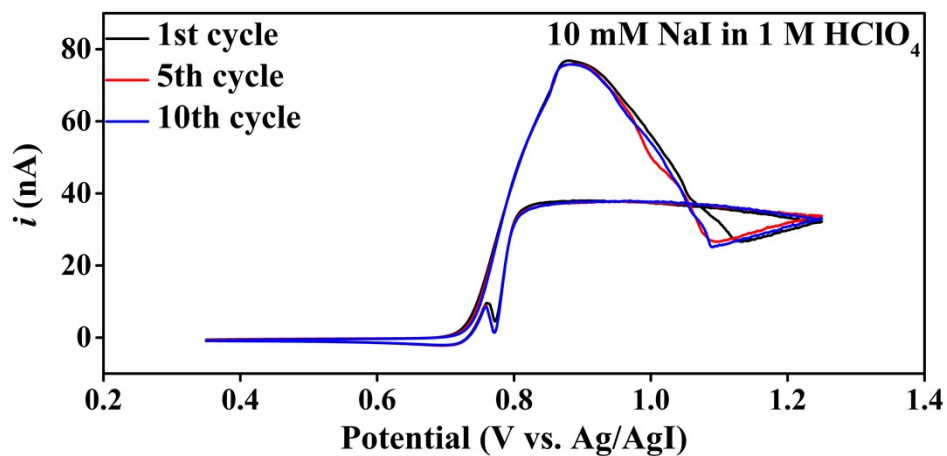

**Figure S4.** The multi-cycles CVs obtained using a Pt UME at 0.02 V/s in an aqueous solution containing 10 mM NaI with 1 M HClO<sub>4</sub>, showing 1<sup>st</sup> (black), 5<sup>th</sup> (blue), and 10<sup>th</sup> (red) cycle, respectively.

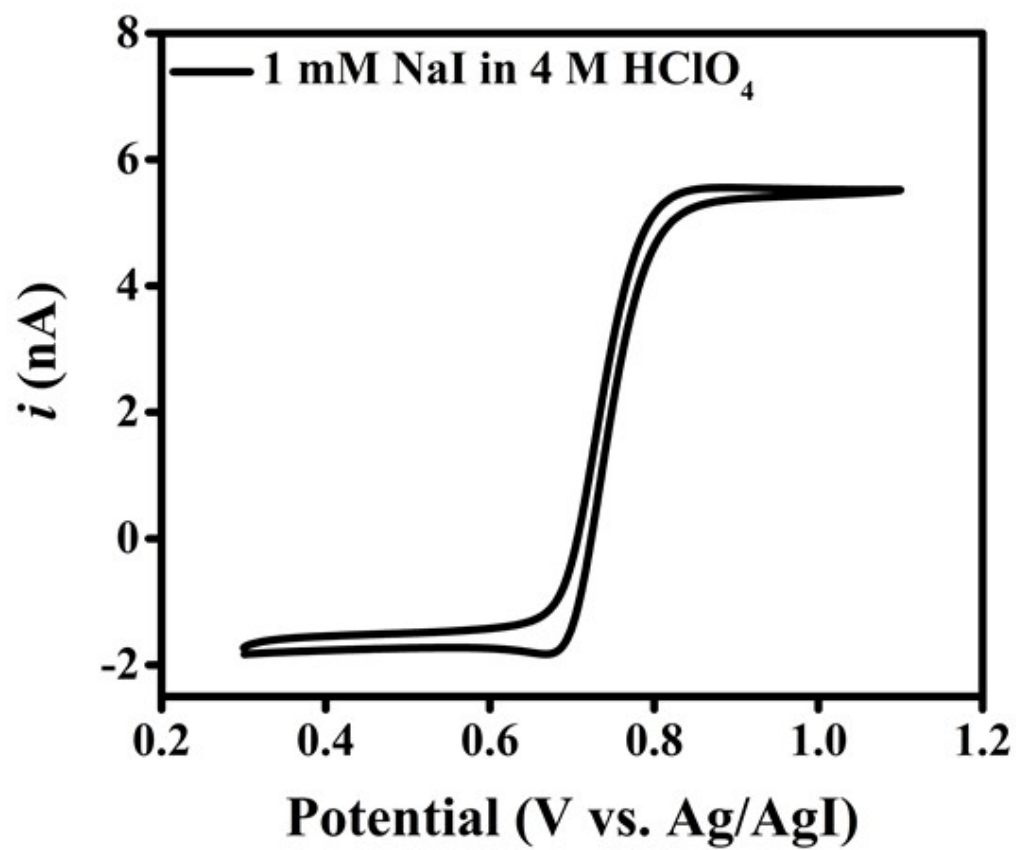

**Figure S5.** CV obtained using a Pt UME at 0.02 V/s in an aqueous solution containing 1 mM NaI + 4 M HClO<sub>4</sub>.

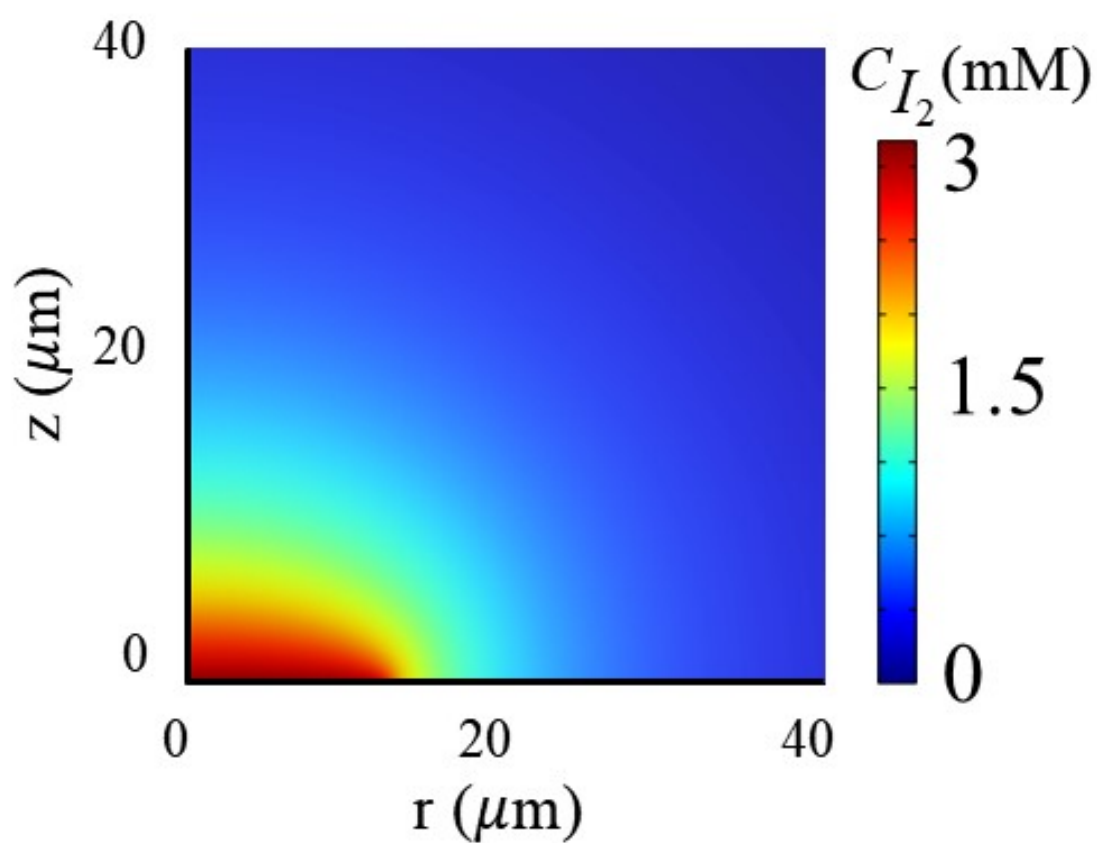

**Figure S6.** The contour plot of  $C_{I_2}$  obtained from the finite element analysis when the oxidative current increases to 29.5 nA due to the electro-oxidation of  $I_3^-$ .

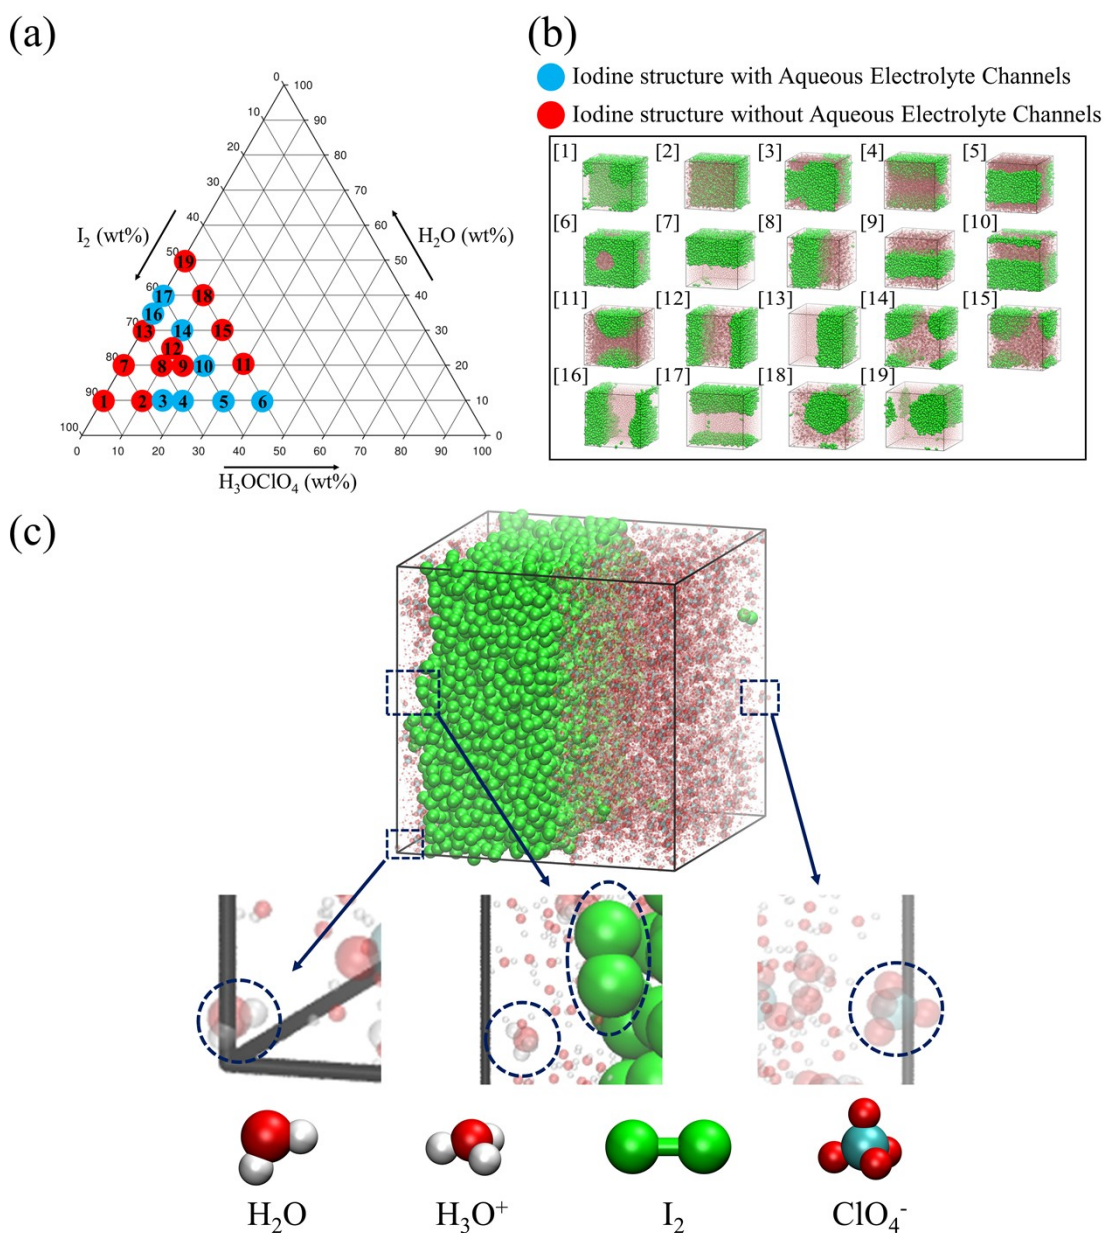

**Figure S7.** (a) The phase diagrams of  $I_2$  interfacial structures with/without I-channels as blue and red circles, respectively, at various weight percentages of  $H_2O$ ,  $I_2$ , and  $(H_3O)^+ClO_4^-$  estimated from (b) the corresponding MD simulation results; the phases of the iodine structures at the designated numbers were estimated from the MD results with the matched numbers. (c) The representative unit cell and its enlarged region are surrounded by dotted rectangle to show each molecule used in the simulation.

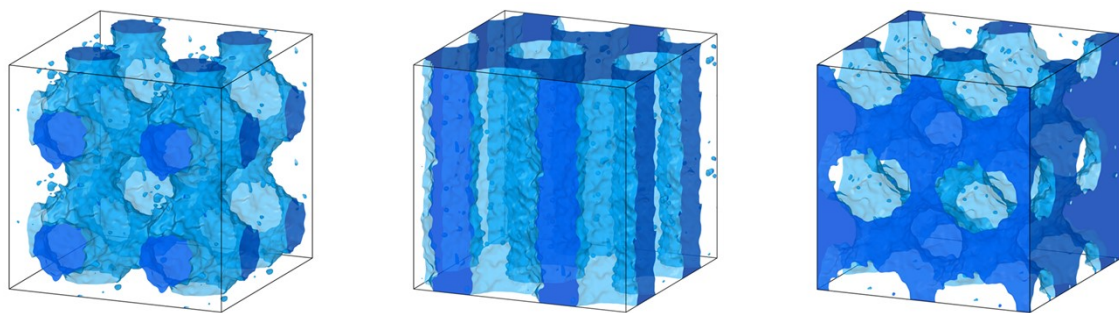

**Figure S8.** The visualized electrolyte channels from the expanded iodine structures, which are shown as representatives of the porous iodine structure with electrolyte channels in Figure 3b.

**Note S3. The detailed description of the finite element analysis for electrokinetic transport of I<sup>-</sup> through the model channel.**

Figure S9 shows the domains and boundaries of the finite element analysis. The domain illustrates the simplified model I<sup>-</sup> channel in the I<sub>2</sub>(H<sup>+</sup>)<sub>n</sub> interfacial domain. Three different boundaries delineated the domains, which are marked in black, red, and blue. The boundary B1 corresponds to the interface between the channel and the bulk solution where the concentrations of both iodide and its counter ions maintain their bulk concentration levels. The boundary B2 represents the wall of the model channel with a certain surface charge density ( $\sigma_{Ch}$ ). The boundary B3 corresponds to the electrode where I<sup>-</sup> is oxidized and its rate is governed by its mass transfer.

The various equations were fully coupled and solved to investigate the transport of I<sup>-</sup> through the model channel. Poisson's equation (Equation S2) was used to solve an electrical potential ( $\phi$ ) in the model channel domain.

$$\nabla^2 \cdot (-\epsilon_0 \epsilon_r \phi) = F \sum_i C_i z_i \quad (S2)$$

here,  $\epsilon_0$  is the vacuum permittivity ( $8.85 \times 10^{-12}$  F/m) and  $\epsilon_r$  is the relative permittivity of the domain, which is 78 for liquid water.  $F$  is the Faraday constant (96485 C/mol).  $C_i$  and  $z_i$  are the concentrations and charges of the chemical species,  $i$ . The flux of  $i$ ,  $J_i$ , was obtained using the Nernst-Planck equation (S3).

$$J_i = -D_i \nabla C_i - z_i \frac{D_i}{RT} F C_i \nabla \phi + C_i u \quad (S3)$$



here,  $R$  is the molar gas constant (8.314 J/mol · K) and  $T$  is the temperature (293.15 K). Finally, the fluid flow  $u$  was solved using the Navier-Stokes equation to consider convection-type transport.

$$\rho(u \cdot \nabla)u = -\nabla p + \mu \nabla^2 u + F \sum_i (z_i C_i) \nabla \phi \quad (\text{S4})$$

here,  $\rho$  and  $\mu$  are the density and the dynamic viscosity of the solution, respectively, which corresponds to 998 kg/m<sup>3</sup> and 0.001 Pa · S for liquid water, respectively.  $p$  is the pressure. The incompressible flow condition was applied when solving the Navier-Stokes equation.

$$\rho \nabla \cdot u = 0 \quad (\text{S5})$$

In the analysis,  $D_{I^-}$  and  $D$  of its counter anion were set to  $1.75 \times 10^{-5}$  cm<sup>2</sup>/s. In addition, other parameters were used as variables in the analysis: the channel width ( $w_{Ch}$ ), the channel length ( $l_{Ch}$ ),  $\sigma_{Ch}$ , and the concentration of I<sup>-</sup> within the model channel ( $C_{I^-, Ch}$ ). The above equations were fully coupled and solved under steady-state conditions using the Tertiary Current Distribution and Laminar Flow modules in COMSOL Multiphysics (ver. 6.0). The current due to oxidation of I<sup>-</sup> on the electrode was estimated from the inward flux of I<sup>-</sup> ( $J_{I^-}$ ) at B3 by the following equation. In Equation S6,  $n$  is the stoichiometric number of electrons involved in the electrode reaction, which was assumed to be 1 for the analysis.

$$i = nF \int_0^{w_{Ch}} J_{I^-} dr \quad (\text{S6})$$

In addition, electric flux density,  $J_{Electric}$ , was calculated as follows:

$$J_{Electric} = \epsilon_0 \phi \tag{S7}$$

Table S4 lists the boundary conditions for solving the coupled equations.

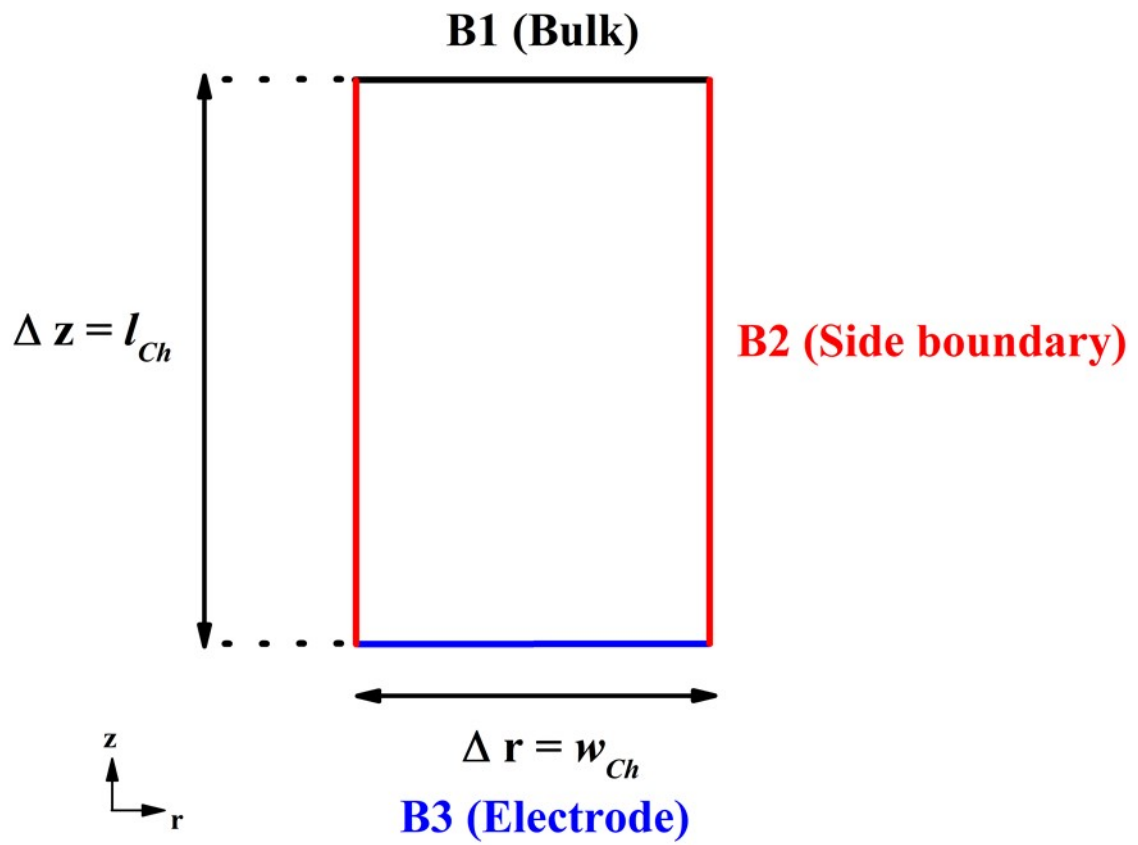

**Figure S9.** The simplified model channel with the 2D domain for the finite element analysis.

**Note S4. The simulated electrokinetic transport of I<sup>-</sup> through the model channel with a neutral surface charge at  $\Delta\phi = +3$  V.**

Figure S10a shows  $J_{I^-}$  along the distance from the electrode to the top of the channel [ $d(z)$ ] at  $\Delta\phi = 0$  V, and therefore, the entire  $J_{I^-}$  was associated with diffusion through the channel. The corresponding  $C_{I^-}$  profile in Figure S10b shows that I<sup>-</sup> was completely depleted only at the electrode surface, and  $C_{I^-}$  linearly increased to the bulk concentration of I<sup>-</sup> (i.e., 10 mM) as  $d(z)$  increased. In contrast to the above case,  $\Delta\phi$  could affect the electro-oxidation of I<sup>-</sup> significantly. Figure S10c shows the  $\phi$  profile along  $d(z)$  at  $\Delta\phi = 3$  V, and  $\phi$  almost linearly decreased as  $d(z)$  increased to approximately 200 nm, and reached 0 V at  $d(z) = 300$  nm. The induced electric-flux density ( $J_{\text{Electric}}$ ), which represents the electric-field strength, is shown as a function of  $d(z)$  in Figure S10d; the equation for  $J_{\text{Electric}}$  is described in Note S3. The curve shows that the electric field was strongly driven within the model channel;  $d(z)$  for the effectively induced electric field was approximately 200 nm from the electrode, and  $J_{\text{Electric}}$  drastically decreased as  $d(z)$  increased to 300 nm. Because of the strongly induced electric field through the channel, migration of I<sup>-</sup> can largely contribute to  $J_{I^-}$ . Figure S10e shows  $J_{I^-}$  associated with diffusion and migration through the channel. I<sup>-</sup> was mainly transported via migration until  $d(z)$  became 200 nm from the electrode, and its extent at the electrode was approximately 6 times higher than that via diffusion through the channel, as shown in Figure S10a. At  $d(z) >$  approximately 250 nm,  $J_{I^-}$  associated with migration decreases, while the diffusional flux increases, and eventually the two fluxes become the same at  $d(z) = 300$  nm. Lastly, Figure S10f shows  $C_{I^-}$  as a function of  $d(z)$  at  $\Delta\phi = +3$  V. I<sup>-</sup> almost depleted in the

channel along  $d(z)$  of approximately 200 nm from the electrode, where its electrokinetic transport was the dominant mass transfer phenomena. As noted in Note S3,  $J_{I^-}$  associated with convection was also calculated by the analysis. However, its contribution to the total  $J_{I^-}$  was negligible compared to that associated with diffusion and migration. Therefore, we only plotted  $J_{I^-}$  associated with diffusion and migration, as shown in Figure S10.

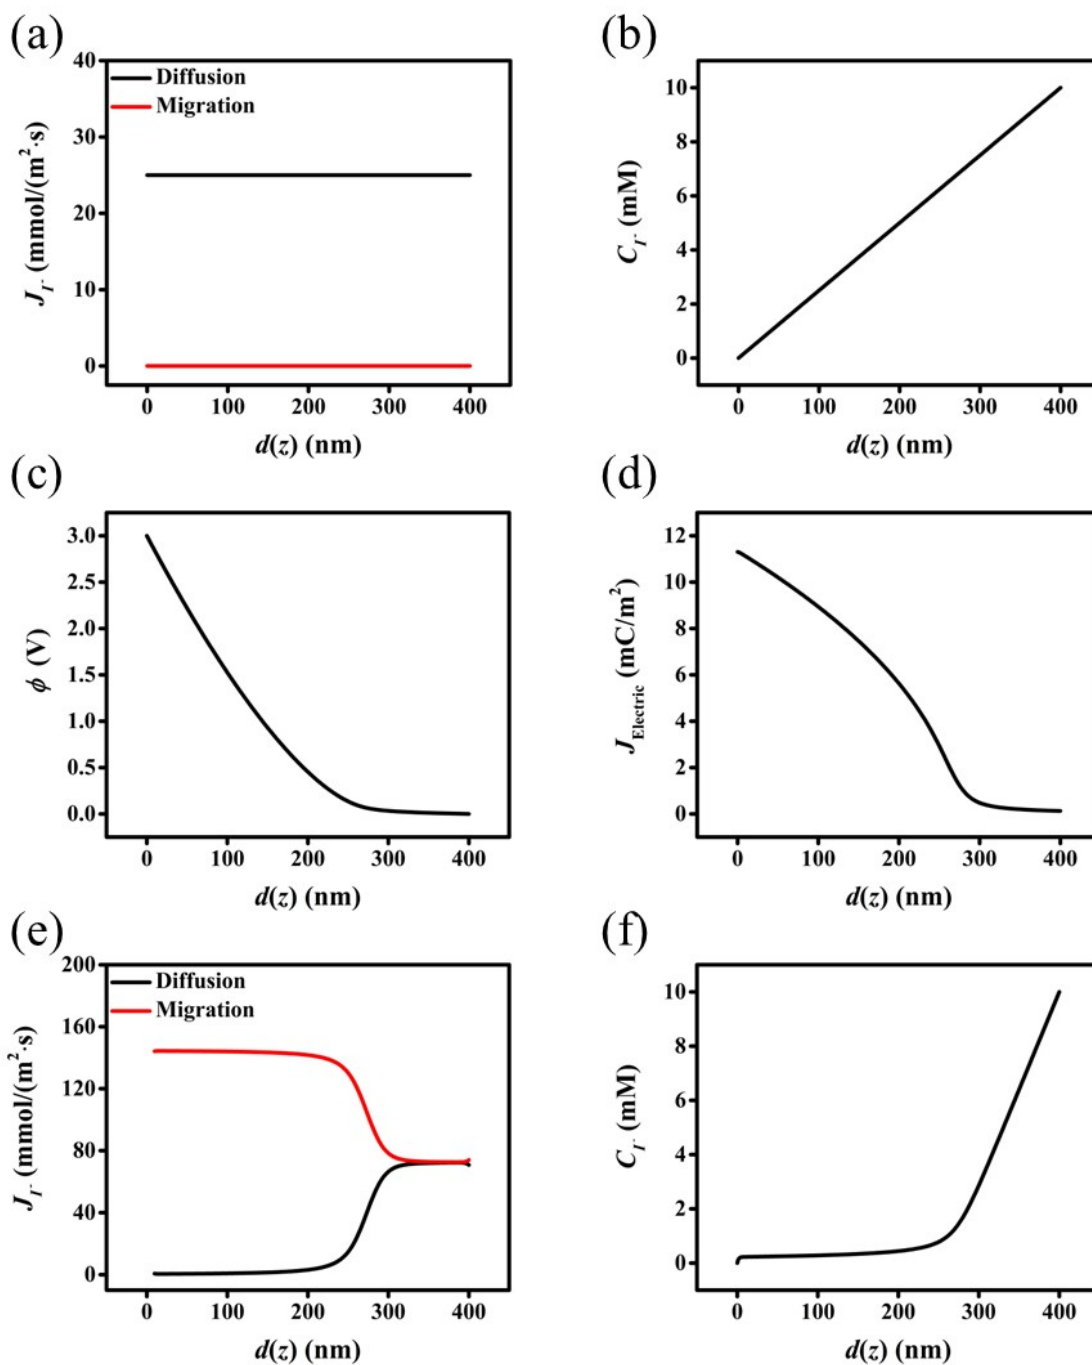

**Figure S10.** (a)  $J_{I^-}$  associated with diffusion (black) and migration (red). (b)  $C_{I^-}$  vs.  $d(z)$  at  $\Delta\phi = 0$  V. (c)  $\phi$ . (d)  $J_{\text{Electric}}$  (e)  $J_{I^-}$  associated with diffusion (black) and migration (red). (f)  $C_{I^-}$  vs.  $d(z)$  at  $\Delta\phi = 3$  V;  $z$ -axis from the electrode to the top of the channel, as described in Figure S9.



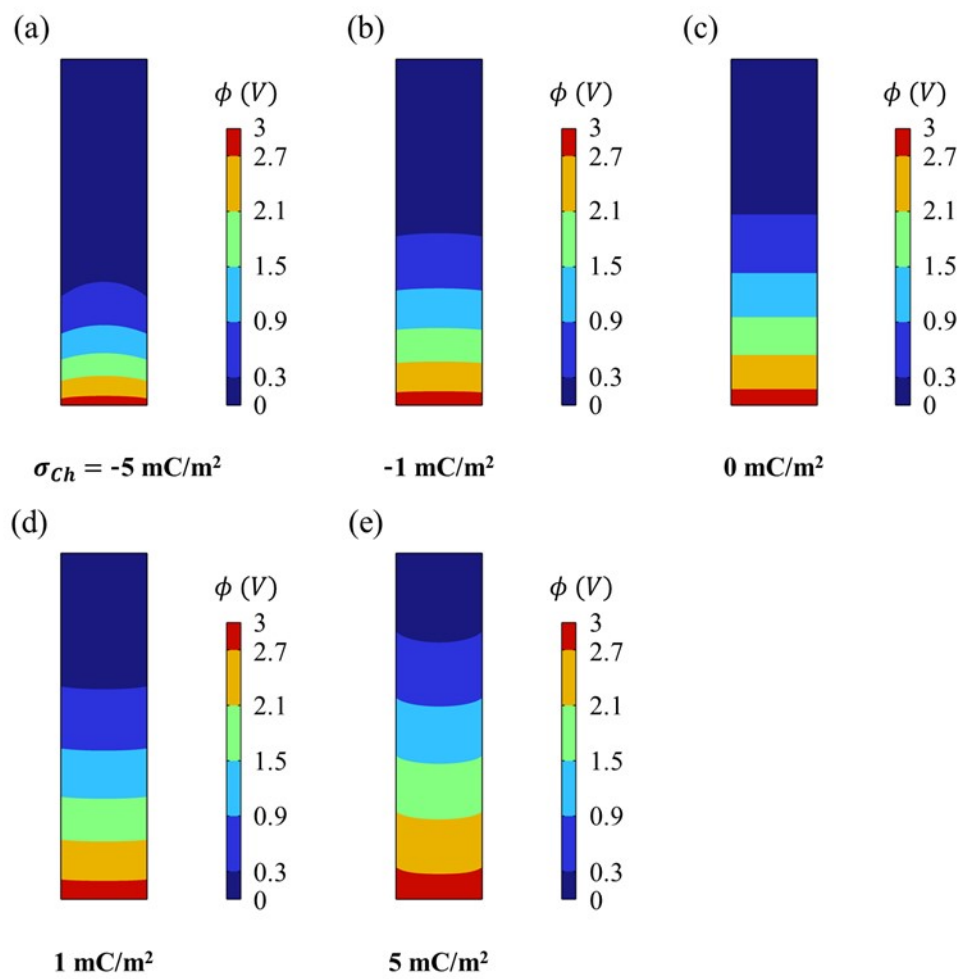

**Figure S11.** The contour plots of  $\phi$  through the model channel at  $\sigma_{ch} =$  (a) -5, (b) -1, (c) 0, (d) 1, and (e) 5 mC/m<sup>2</sup>.



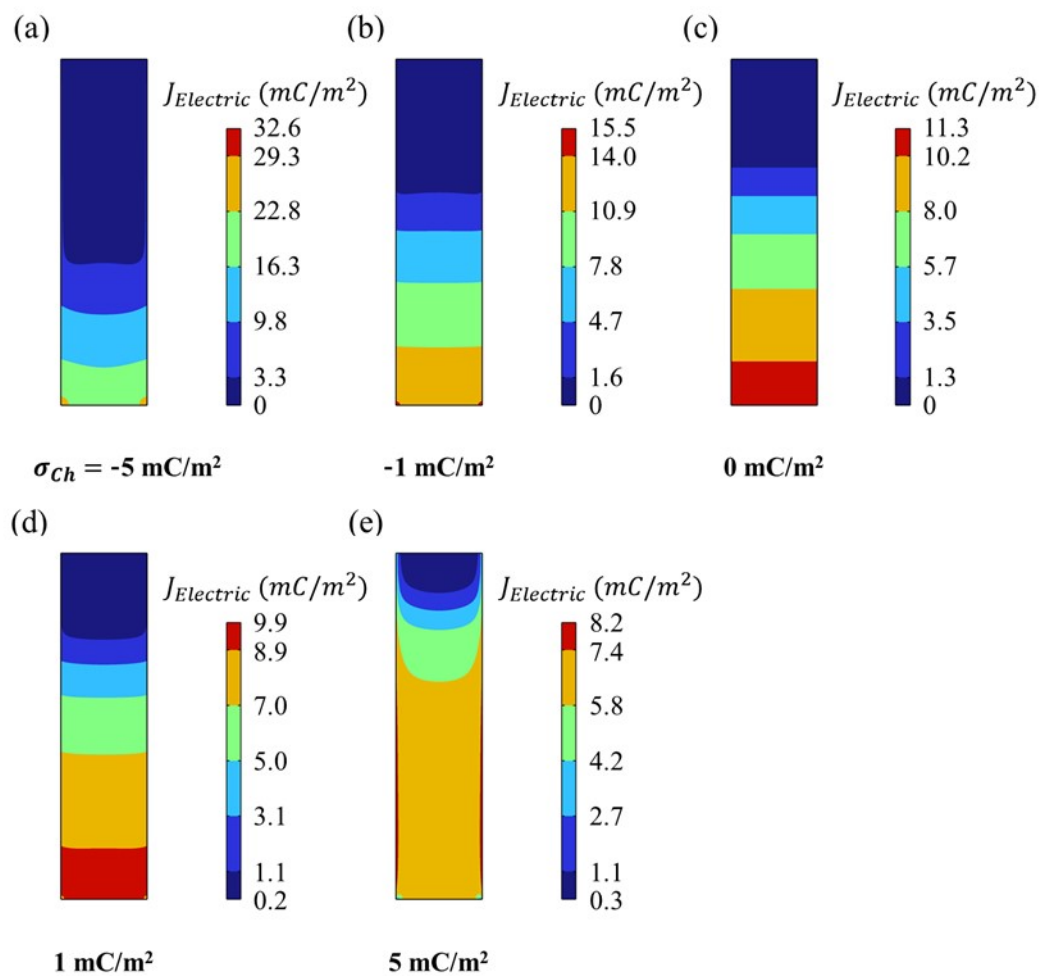

**Figure S12.** The contour plots of  $J_{Electric}$  through the model channel at  $\sigma_{Ch} =$  (a) -5, (b) -1, (c) 0, (d) 1, and (e) 5 mC/m<sup>2</sup>.

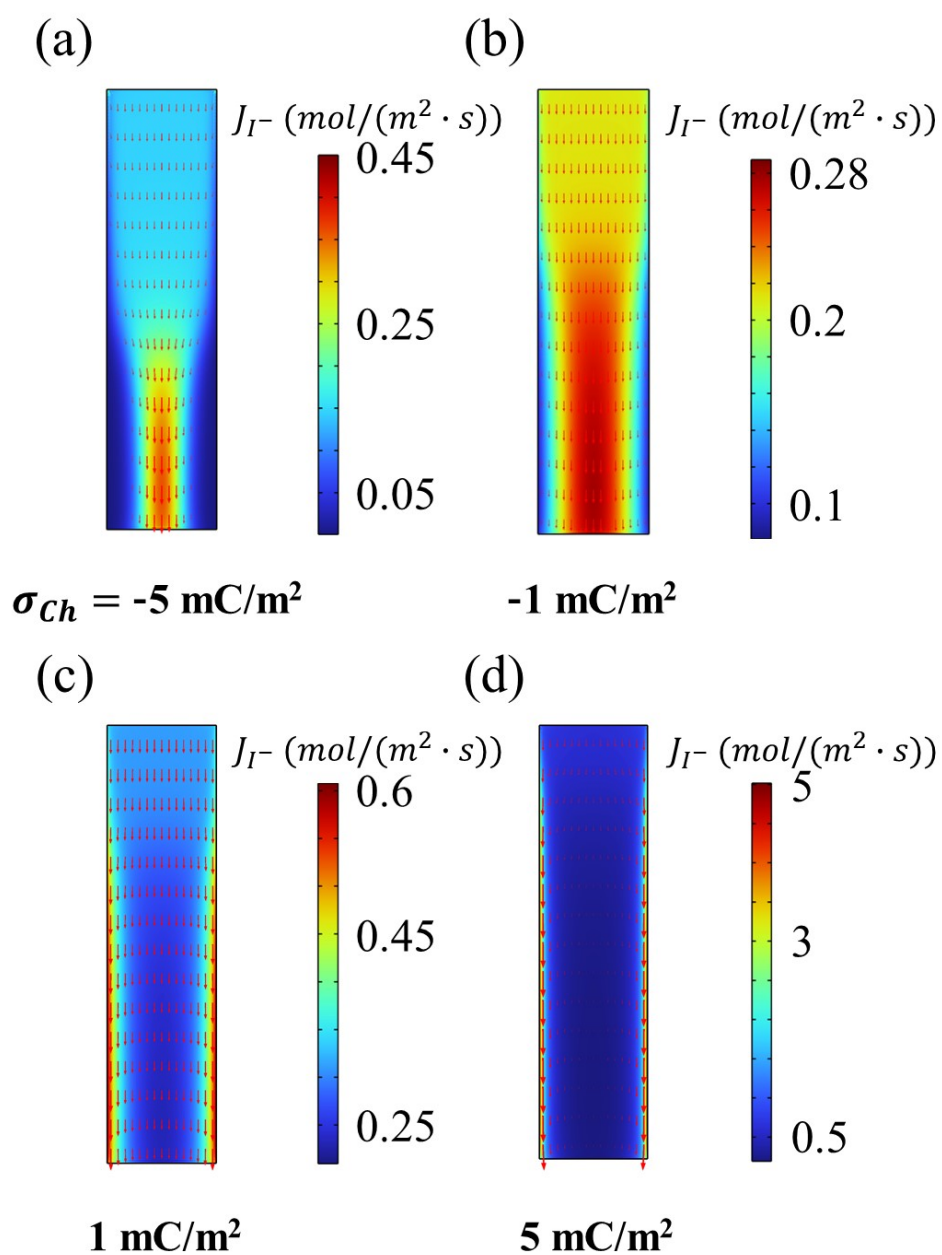

**Figure S13.** The contour plots of  $J_{I^-}$  through the entire model channel at  $\sigma_{ch} =$  (a) -5, (b) -1, (c) +1, and (d) +5  $\text{mC}/\text{m}^2$ ; the points and lengths of the arrows designate the directions and the magnitudes of  $J_{I^-}$ .

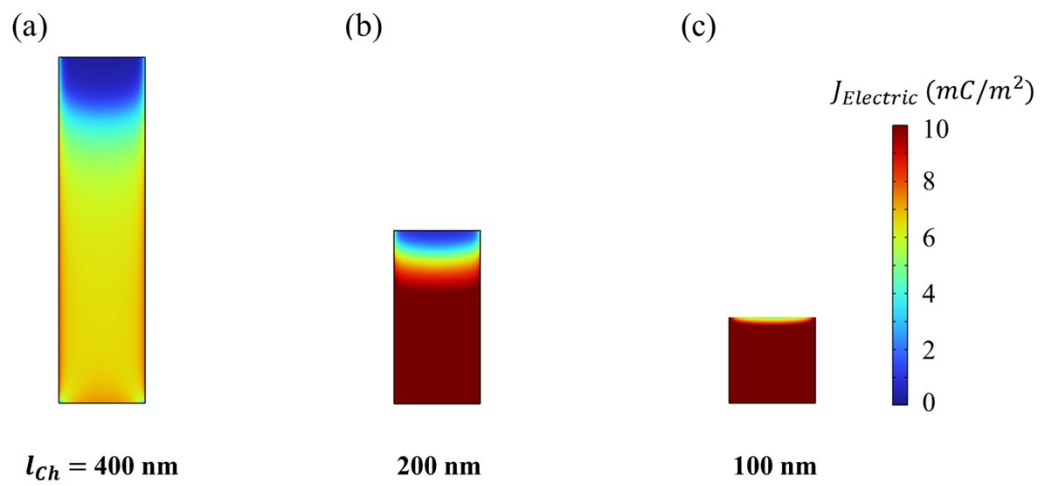

**Figure S14.** The contour plots of  $J_{Electric}$  through the model channel with  $l_{Ch} =$  (a) 400, (b) 200, and (c) 100 nm at  $\sigma_{Ch} = + 5$   $mC/m^2$  and  $w_{Ch} = 100$  nm.

**Note S5. The detailed description of  $i_{EK}$  affected by  $w_{Ch}$ .**

Figure S15 shows the  $i_{EK}/i_D$  vs.  $\Delta\phi$  plots with different  $w_{Ch}$  at  $\sigma_{Ch} = +5$  mC/m<sup>2</sup>. The slope becomes steeper as the channel becomes narrower, and  $i_{EK}/i_D$  at  $\Delta\phi = 3$  V with  $w_{Ch} = 30$  nm is approximately twice larger than that with  $w_{Ch} = 100$  nm. The observed current enhancement is explained by  $J_{I^-}$  at the electrode with different  $w_{Ch}$ , as shown in Figures S16a–c. At  $w_{Ch} = 100$  nm,  $J_{I^-}$  between the wall and core of the channel was significantly different. However,  $J_{I^-}$  in the channel became more uniformly distributed, while its overall magnitude approached that of the wall as  $w_{Ch}$  decreased to 30 nm. These contour plots indicate that the surface conduction of I<sup>-</sup> via electrostatic interactions can more significantly affect the electrokinetic transport of I<sup>-</sup> through the narrow channel, which is in good agreement with previous reports.<sup>4-6</sup>

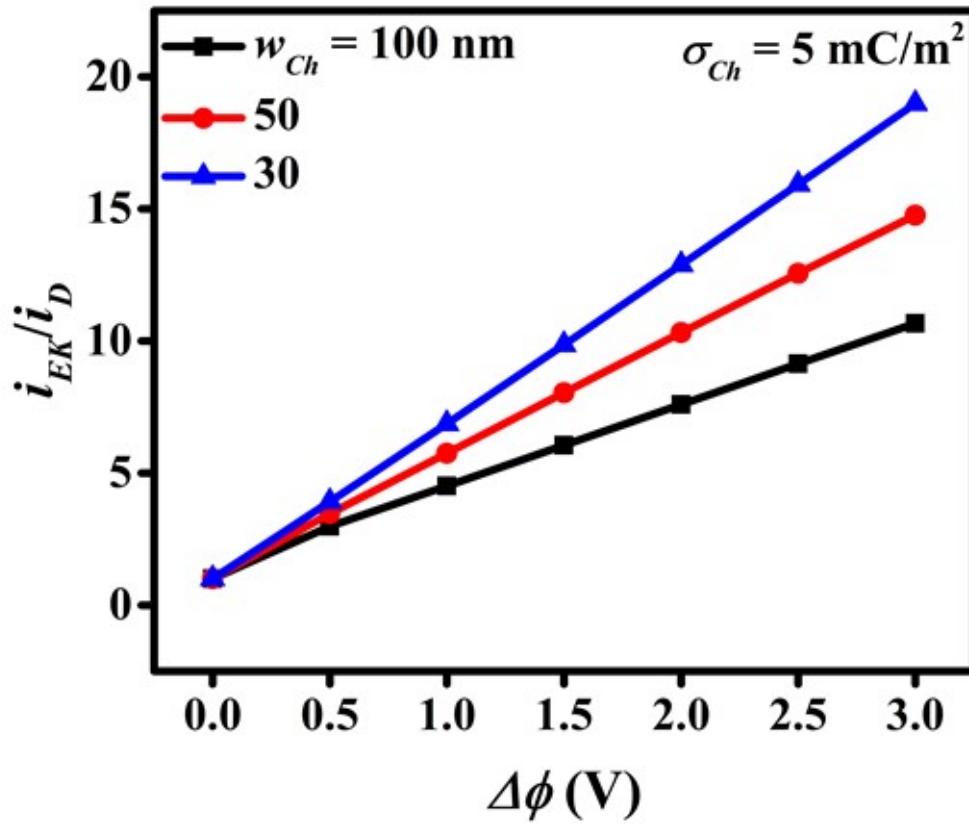

**Figure S15.** The simulated normalized current ( $i_{EK}/i_D$ ) vs.  $\Delta\phi$  plots at  $\sigma_{Ch} = +5 \text{ mC/m}^2$  with  $w_{Ch} = 30$  (blue), 50 (red), and 100 nm (black).

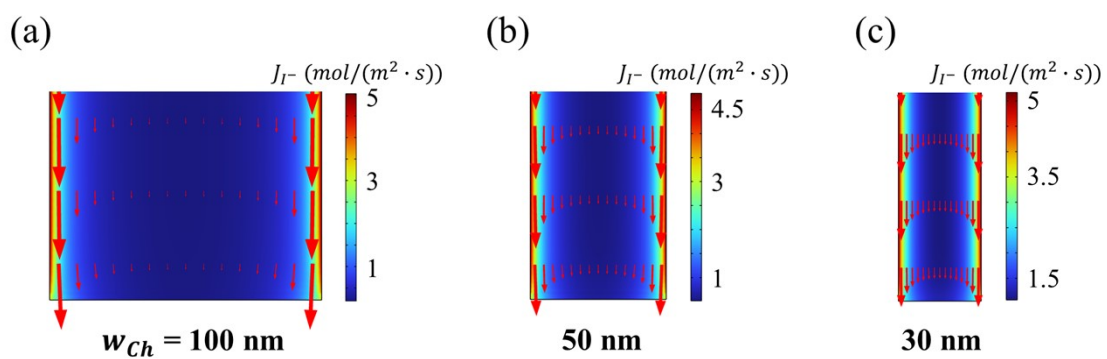

**Figure S16.** The contour plots of  $J_{I^-}$  in the vicinity of the electrode from the model channel at  $\sigma_{Ch} = 5$  mC/m<sup>2</sup> when  $w_{Ch} =$  (a) 100, (b) 50, and (c) 30 nm at  $l_{Ch} = 400$  nm.

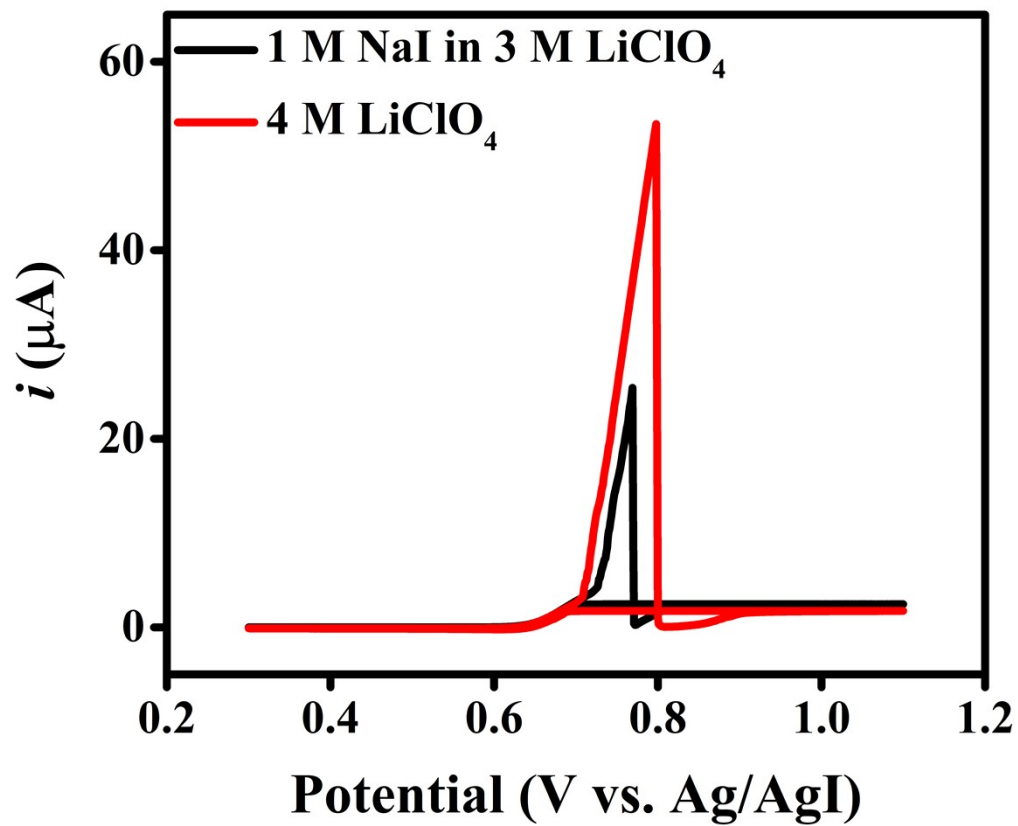

**Figure S17.** CVs obtained using an aqueous 1 M NaI solutions with  $C_{\text{LiClO}_4}^* = 3$  M (black) and 4 M (red).

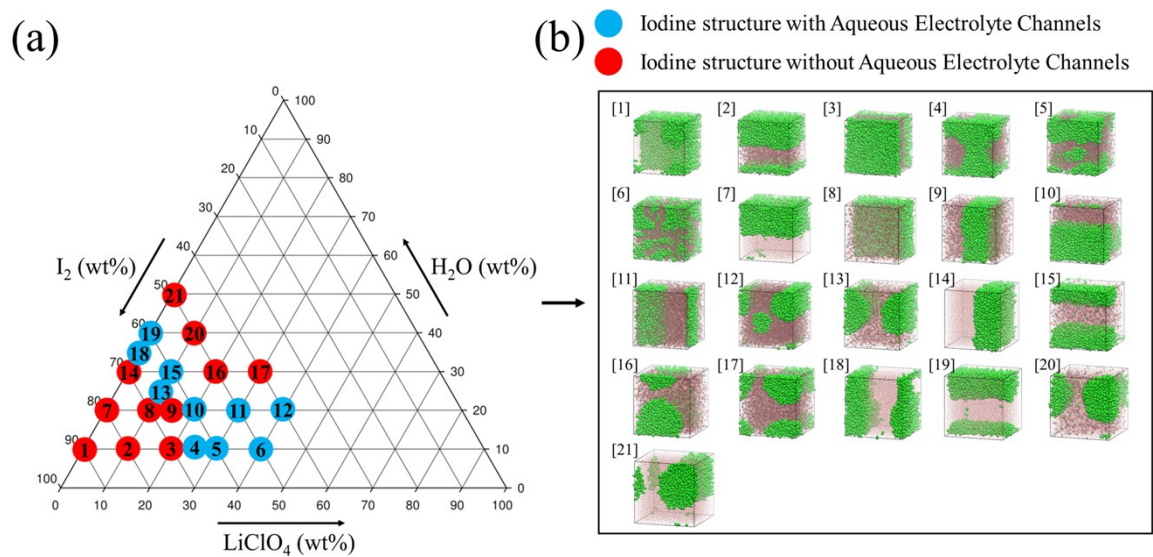

**Figure S18.** (a) The phase diagrams of  $I_2$  interfacial structures with/without I-channels as blue and red circles, respectively, at various weight percentages of  $H_2O$ ,  $I_2$ , and  $LiClO_4$  estimated from (b) the corresponding MD simulation results; the phases of the iodine structures with the designated numbers were estimated from the MD results with the matched numbers.



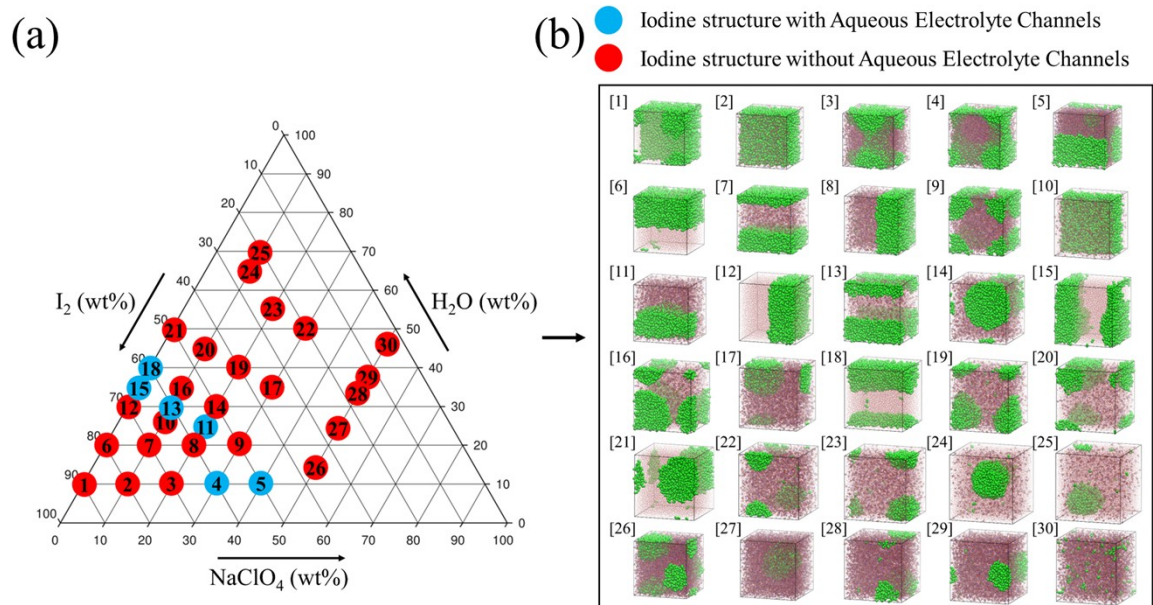

**Figure S19.** (a) The phase diagrams of  $I_2$  interfacial structures with/without I-channels as blue and red circles, respectively, at various weight percentages of  $H_2O$ ,  $I_2$ , and  $NaClO_4$  estimated from (b) the corresponding MD simulation results; the phases of the iodine structures with the designated numbers were estimated from the MD results with the matched numbers.

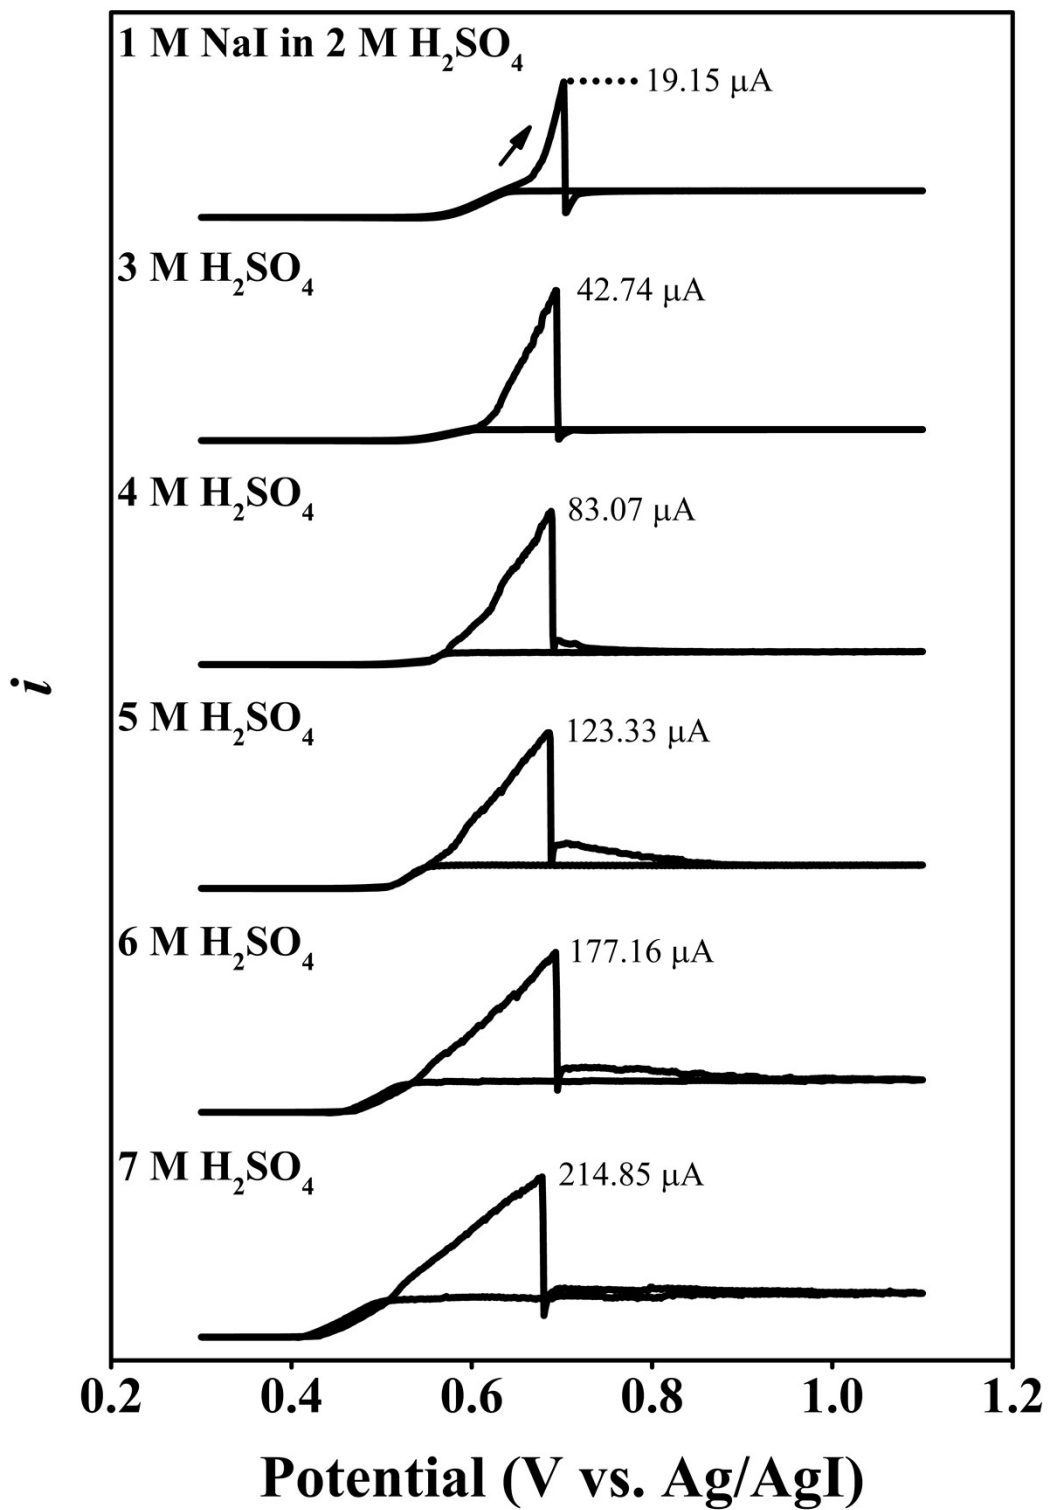

**Figure S20.** CVs obtained using an aqueous 1 M NaI solutions with  $C_{H_2SO_4}^*$  from 2 to 7 M.

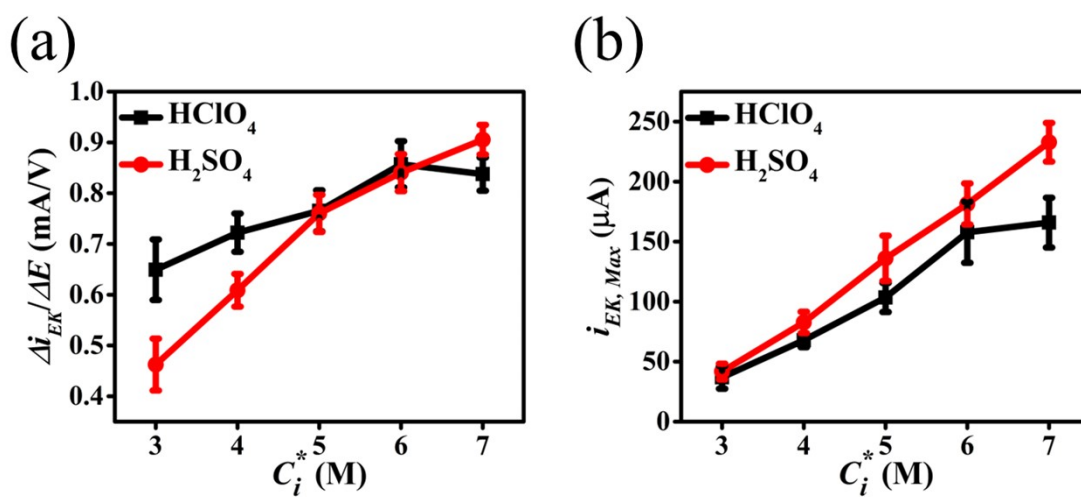

**Figure S21.** The (a)  $\Delta i_{EK}/\Delta E$  and (b)  $i_{EK,Max}$  vs.  $C_i^*$  plots from the CVs obtained using 1 M NaI solution containing the two different electrolytes ( $i = \text{HClO}_4$  and  $\text{H}_2\text{SO}_4$ ) at varied concentrations.

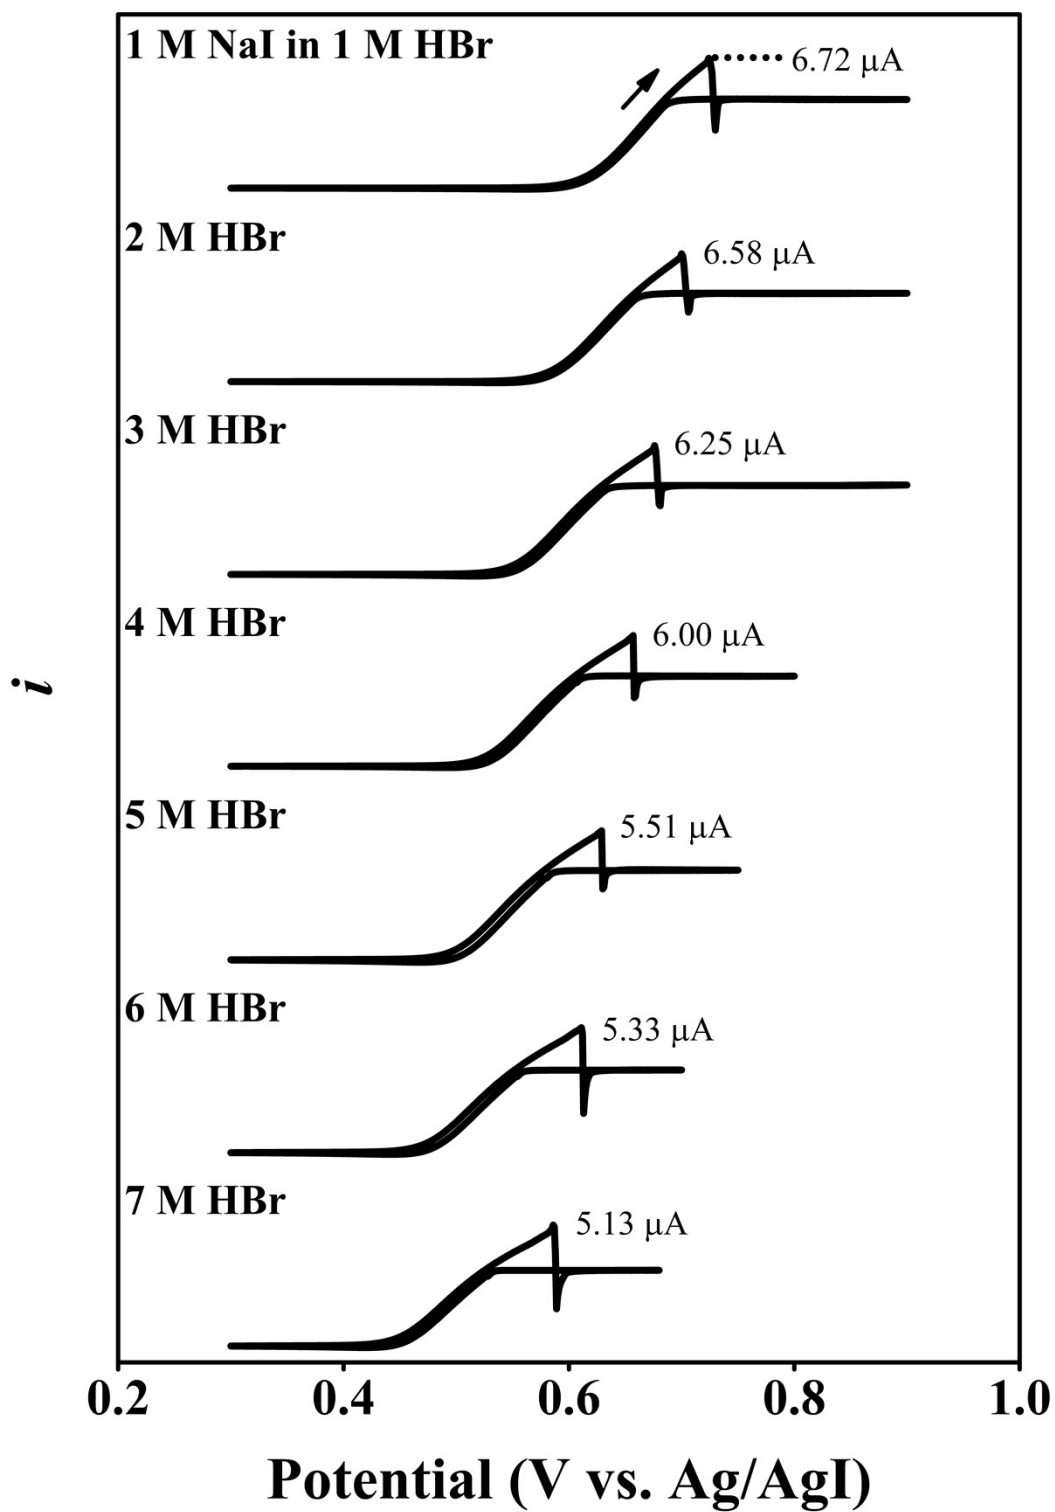

**Figure S22.** CVs obtained using an aqueous 1 M NaI solution with  $C_{\text{HBr}}^*$  from 1 to 7 M.

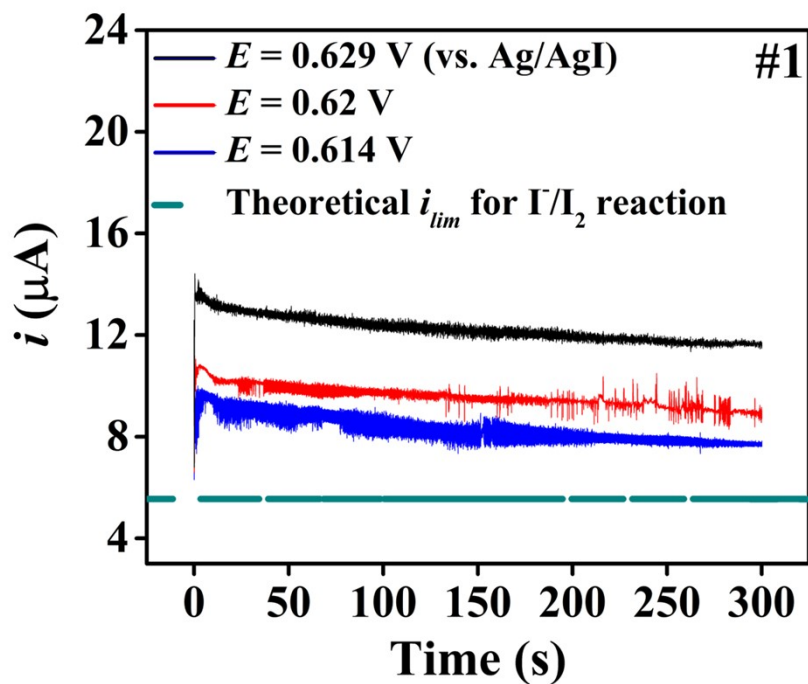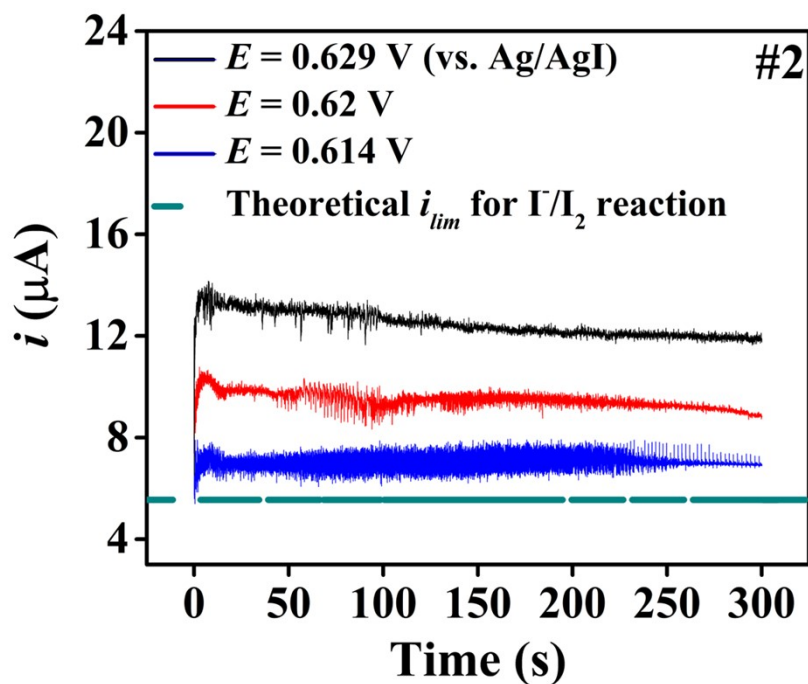

**Figure S23.** The two sets of  $i$ - $t$  experiments measured using a Pt UME in an aqueous 1 M NaI solution containing 4 M  $\text{HClO}_4$  with different electrode potentials; 0.614 (blue), 0.62 (red), and 0.629 (black) for 300 s.

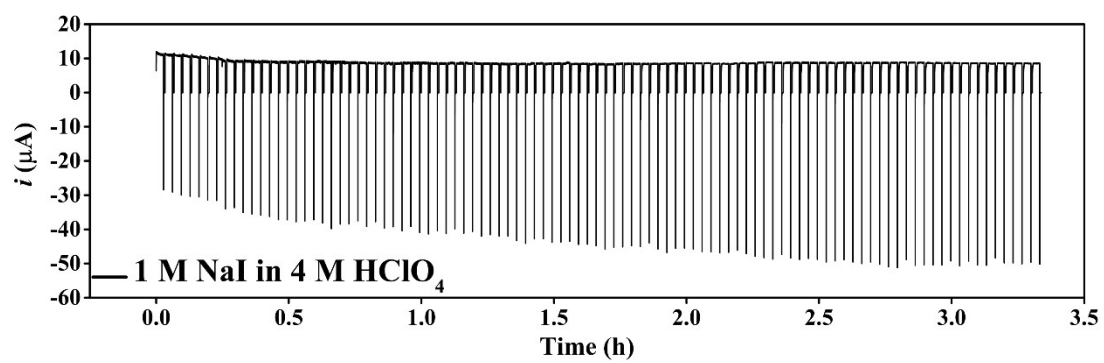

**Figure S24.** The obtained multi-cycles chronoamperogram (CA) using a Pt UME in an aqueous solution containing 1 M NaI with 4 M HClO<sub>4</sub>.

**Table S1.** Room temperature ionic conductivity ( $\sigma$ ) of (top) 1 M HClO<sub>4</sub> aqueous solutions with different bulk I<sup>-</sup> concentrations,  $C_{I^-}^*$ , and (bottom) 1 M NaI aqueous solutions with different bulk electrolyte conditions,  $C_i^*$ . Conductivity of blank spaces in the Table was not obtained due to limited solubility of salts in corresponding conditions in an aqueous solution.

| $C_{I^-}^*$ | $C_{HClO_4}^* = 1 \text{ M}$ |  |  |  |  |  |
|-------------|------------------------------|--|--|--|--|--|
| 1 (mM)      | 338.2 ± 11.7 (mS/cm)         |  |  |  |  |  |
| 10          | 339 ± 7.5                    |  |  |  |  |  |
| 100         | 343.7 ± 10.1                 |  |  |  |  |  |

  

| $C_i^*$ | $i = \text{HClO}_4$ | LiClO <sub>4</sub> | NaClO <sub>4</sub> | H <sub>2</sub> SO <sub>4</sub> | HCl       | HBr       |
|---------|---------------------|--------------------|--------------------|--------------------------------|-----------|-----------|
| 1 (M)   | 356.7±9.9 (mS/cm)   | 132.1±1.0          | 136.9±2.3          | 415.0±10.8                     | 347.2±5.3 | 367.5±3.5 |
| 2       | 536.4±15.4          | 163.8±0.7          | 170.5±2.6          | 620.0±14.8                     | 537.0±6.2 | 562.6±5.6 |
| 3       | 636.3±20.9          | 182.6±1.3          | 187.1±2.9          | 709.1±3.4                      | 659.8±8.7 | 677.2±8.1 |
| 4       | 664.7±15.5          | 188.2±1.0          | 190.4±2.2          | 720.2±8                        | 730.8±4.2 | 724.4±6.2 |
| 5       | 638.7±21            |                    | 181.4±2.3          | 669.9±6.7                      | 758.2±3.7 | 733.4±4.4 |
| 6       | 583.9±17.1          |                    | 165.4±2.7          | 603.4±15.8                     |           | 720.4±6.7 |
| 7       | 508±18              |                    | 144.3±2.2          | 515.8±20.7                     |           | 684±8.9   |
| 8       |                     |                    | 121.1±1.8          |                                |           |           |

**Table S2.** The number of simulated molecules (right) for each weight percentage condition (left).

| H <sub>2</sub> O (wt%) | I <sub>2</sub> (wt%) | H <sub>3</sub> OClO <sub>4</sub> (wt%) | H <sub>2</sub> O | I <sub>2</sub> | H <sub>3</sub> O <sup>+</sup> /ClO <sub>4</sub> <sup>-</sup> |
|------------------------|----------------------|----------------------------------------|------------------|----------------|--------------------------------------------------------------|
| 20                     | 70                   | 10                                     | 8882             | 2206           | 675                                                          |
| 30                     | 60                   | 10                                     | 13323            | 1891           | 675                                                          |
| 40                     | 50                   | 10                                     | 17764            | 1576           | 675                                                          |
| 10                     | 70                   | 20                                     | 4441             | 2206           | 1351                                                         |
| 20                     | 60                   | 20                                     | 8882             | 1891           | 1351                                                         |
| 30                     | 50                   | 20                                     | 13323            | 1576           | 1351                                                         |
| 10                     | 60                   | 30                                     | 4441             | 1891           | 2026                                                         |
| 20                     | 50                   | 30                                     | 8882             | 1576           | 2026                                                         |
| 10                     | 50                   | 40                                     | 4441             | 1576           | 2701                                                         |
| 35                     | 65                   | 0                                      | 15543            | 2049           | 0                                                            |
| 25                     | 65                   | 10                                     | 11102            | 2049           | 675                                                          |
| 10                     | 80                   | 10                                     | 4441             | 2522           | 675                                                          |
| 20                     | 65                   | 15                                     | 8882             | 2049           | 1013                                                         |
| 10                     | 75                   | 15                                     | 4441             | 2364           | 1013                                                         |

| H <sub>2</sub> O (wt%) | I <sub>2</sub> (wt%) | LiClO <sub>4</sub> (wt%) | H <sub>2</sub> O | I <sub>2</sub> | Li <sup>+</sup> /ClO <sub>4</sub> <sup>-</sup> |
|------------------------|----------------------|--------------------------|------------------|----------------|------------------------------------------------|
| 20                     | 70                   | 10                       | 8882             | 2206           | 745                                            |
| 30                     | 60                   | 10                       | 13323            | 1891           | 745                                            |
| 40                     | 50                   | 10                       | 17764            | 1576           | 745                                            |
| 10                     | 70                   | 20                       | 4441             | 2206           | 1490                                           |
| 20                     | 60                   | 20                       | 8882             | 1891           | 1490                                           |
| 30                     | 50                   | 20                       | 13323            | 1576           | 1490                                           |
| 10                     | 60                   | 30                       | 4441             | 1891           | 2235                                           |
| 20                     | 50                   | 30                       | 8882             | 1576           | 2235                                           |
| 10                     | 50                   | 40                       | 4441             | 1576           | 2979                                           |
| 25                     | 65                   | 10                       | 11102            | 2049           | 745                                            |
| 10                     | 80                   | 10                       | 4441             | 2522           | 745                                            |
| 20                     | 65                   | 15                       | 8882             | 2049           | 1117                                           |
| 10                     | 75                   | 15                       | 4441             | 2364           | 1117                                           |
| 10                     | 40                   | 50                       | 4441             | 1261           | 3724                                           |
| 20                     | 40                   | 40                       | 8882             | 1261           | 2979                                           |
| 10                     | 65                   | 25                       | 4441             | 2049           | 1862                                           |



|    |    |    |       |      |      |
|----|----|----|-------|------|------|
| 30 | 40 | 30 | 13323 | 1261 | 2235 |
|----|----|----|-------|------|------|

| H <sub>2</sub> O<br>(wt%) | I <sub>2</sub><br>(wt%) | NaClO <sub>4</sub><br>(wt%) | H <sub>2</sub> O | I <sub>2</sub> | Na <sup>+</sup> /ClO <sub>4</sub> <sup>-</sup> |
|---------------------------|-------------------------|-----------------------------|------------------|----------------|------------------------------------------------|
| 70                        | 20                      | 10                          | 31087            | 630            | 653                                            |
| 30                        | 60                      | 10                          | 13323            | 1891           | 653                                            |
| 20                        | 70                      | 10                          | 8882             | 2206           | 653                                            |
| 45                        | 45                      | 10                          | 19984            | 1418           | 653                                            |
| 27                        | 63                      | 10                          | 11991            | 1986           | 653                                            |
| 63                        | 27                      | 10                          | 27978            | 851            | 653                                            |
| 10                        | 70                      | 20                          | 4441             | 2206           | 1307                                           |
| 56                        | 24                      | 20                          | 24870            | 756            | 1307                                           |
| 40                        | 40                      | 20                          | 17764            | 1261           | 1307                                           |
| 24                        | 56                      | 20                          | 10658            | 1765           | 1307                                           |
| 10                        | 60                      | 30                          | 4441             | 1891           | 1960                                           |
| 49                        | 21                      | 30                          | 21761            | 662            | 1960                                           |
| 35                        | 35                      | 30                          | 15543            | 1103           | 1960                                           |
| 21                        | 49                      | 30                          | 9326             | 1544           | 1960                                           |
| 30                        | 20                      | 50                          | 13323            | 630            | 3267                                           |
| 34                        | 16                      | 50                          | 15099            | 504            | 3267                                           |
| 38                        | 12                      | 50                          | 16876            | 378            | 3267                                           |
| 42                        | 8                       | 50                          | 18652            | 252            | 3267                                           |
| 46                        | 4                       | 50                          | 20429            | 126            | 3267                                           |
| 35                        | 15                      | 50                          | 15543            | 473            | 3267                                           |
| 25                        | 25                      | 50                          | 11102            | 788            | 3267                                           |
| 15                        | 35                      | 50                          | 6661             | 1103           | 3267                                           |
| 10                        | 80                      | 10                          | 4441             | 2522           | 653                                            |
| 40                        | 60                      | 0                           | 17764            | 1891           | 0                                              |
| 10                        | 60                      | 30                          | 4441             | 1891           | 1960                                           |
| 35                        | 55                      | 10                          | 15543            | 1734           | 653                                            |
| 30                        | 70                      | 0                           | 13323            | 2206           | 0                                              |
| 50                        | 50                      | 0                           | 22205            | 1576           | 0                                              |
| 30                        | 50                      | 20                          | 13323            | 1576           | 1307                                           |
| 10                        | 50                      | 40                          | 4441             | 1576           | 2614                                           |
| 20                        | 60                      | 20                          | 8882             | 1891           | 1307                                           |
| 20                        | 80                      | 0                           | 8882             | 2522           | 0                                              |
| 10                        | 90                      | 0                           | 4441             | 2837           | 0                                              |

**Table S3.** The domain and boundary conditions used for the finite element analysis, as described in Note S2 using the domain shown in Figure S3.

| Domain or Boundary | Nernst-Planck                                                  |
|--------------------|----------------------------------------------------------------|
| Domain             | $C_{I_3^-},initial = C_{I_3^-}^*{}^{1,2}, C_{I_2},initial = 0$ |
| B1                 | $C_{I_3^-} = C_{I_3^-}^*, C_{I_2} = 0$                         |
| B2                 | $-n \cdot J_i = 0^3$                                           |

<sup>1</sup>  $C_{i,initial}$  indicates the initial concentration of  $i$  chemical species.

<sup>2</sup>  $C_{I_3^-}^*$  was estimated to 3.3, 33.3 and 333.3 mM for  $C_{I_3^-}^* = 10, 100, \text{ and } 1000$  mM, respectively.

<sup>3</sup>  $n$  indicates the surface normal vector.

**Table S4.** The boundary conditions used in the finite element analyses, as described in Note S3 using the domain shown in Figure S9.

| Boundary | Poisson                                                      | Nernst-Planck               | Navier-Stokes                                                                                              |
|----------|--------------------------------------------------------------|-----------------------------|------------------------------------------------------------------------------------------------------------|
| B1       | $\phi = 0 \text{ V}$                                         | $C_i = C_i^*$               | $[-p\mathbf{I} + \mu(\nabla\mathbf{u} + (\nabla\mathbf{u})^T)] \cdot \mathbf{n} = \mathbf{0}$ <sup>1</sup> |
| B2       | $-n \cdot (\epsilon_0 \epsilon_r \nabla \phi) = \sigma_{Ch}$ | $-n \cdot (J_i + uC_i) = 0$ | $u = 0$                                                                                                    |
| B3       | $\phi = \phi_{app}$ <sup>2</sup>                             | $C_i = 0$                   | $u = 0$                                                                                                    |

<sup>1</sup> The equation corresponds to zero-normal-stress condition, where I is the identity matrix.

<sup>2</sup>  $\phi_{app}$  was increased from 0 to 3 V in 0.5 V of increments to generate the electrical potential difference ( $\Delta\phi$ ) within the model channel.

## References

1. C. Park and J. Chang, *Electrochim. Acta*, 2021, **368**, 137650.
2. A. J. Bard and L. R. Faulkner, *Electrochemical Methods: Fundamentals and Applications*, John Wiley & Sons, Inc., 2001, pp. 168-176.
3. A. J. Bard and L. R. Faulkner, *Electrochemical Methods: Fundamentals and Applications*, John Wiley & Sons, Inc., 2001, pp. 92-107.
4. E. V. Dydek, B. Zaltzman, I. Rubinstein, D. S. Deng, A. Mani and M. Z. Bazant, *Phys. Rev. Lett.*, 2011, **107**, 118301.
5. D. Deng, E. V. Dydek, J.-H. Han, S. Schlumpberger, A. Mani, B. Zaltzman and M. Z. Bazant, *Langmuir*, 2013, **29**, 16167-16177.
6. F. H. J. van der Heyden, D. Stein and C. Dekker, *Phys. Rev. Lett.*, 2005, **95**, 116104.
